# Supplementary material
Source: MDPI journal article supplement (https://www.mdpi.com/2073-4344/13/5/911)
Supplement: s1 [file s1]

# New Platinum Complexes from Salen- and Hydroxy-Substituted Salpn-Naphthalene Ligands with CO<sub>2</sub> Reduction Activity

Javier O. Rivera-Reyes <sup>1,2</sup>, Joesene Soto-Pérez <sup>1,2</sup>, Miguel Sepulveda-Pagán <sup>3</sup>, Linguo Lu <sup>1</sup>, Justin Borrero-Negrón <sup>3</sup>, Alanys V. Luna-Ramírez <sup>1,2</sup>, Pedro Trinidad-Pérez <sup>1,2</sup>, Yomaira Pagán-Torres <sup>3</sup>, Zhongfang Chen <sup>1</sup>, Carlos R. Cabrera <sup>4</sup>, William C. West <sup>5</sup>, John-Paul Jones <sup>5</sup> and Dalice M. Piñero Cruz <sup>1,2,\*</sup>

<sup>1</sup> Chemistry Department, College of Natural Sciences, Rio Piedras Campus, University of Puerto Rico, P.O. Box 23346, San Juan, PR 00931-3346, USA;  
javier.rivera19@upr.edu (J.O.R.-R.);

<sup>2</sup> Molecular Science Research Center, University of Puerto Rico, 1390 Ponce de León, San Juan, PR 00926, USA

<sup>3</sup> Department of Chemical Engineering, University of Puerto Rico-Mayagüez Campus, Mayagüez, PR 00681-9000, USA

<sup>4</sup> Department of Chemistry, University of Texas, El Paso, 500 West University Avenue, El Paso, TX 79968, USA

<sup>5</sup> Jet Propulsion Laboratory, California Institute of Technology, Pasadena, CA 91109, USA

\* Correspondence: dalice.pinero@upr.edu

**Table of Contents**

|                                                |    |
|------------------------------------------------|----|
| <b>NMR</b> .....                               | 3  |
| <b>FTIR</b> .....                              | 7  |
| <b>UV-Vis</b> .....                            | 8  |
| <b>Structural characterization</b> .....       | 11 |
| <b>DFT calculations</b> .....                  | 16 |
| <b>Electrochemical studies</b> .....           | 18 |
| <b>CO<sub>2</sub> reduction reaction</b> ..... | 19 |
| <b>Bulk Electrolysis</b> .....                 | 21 |

## NMR

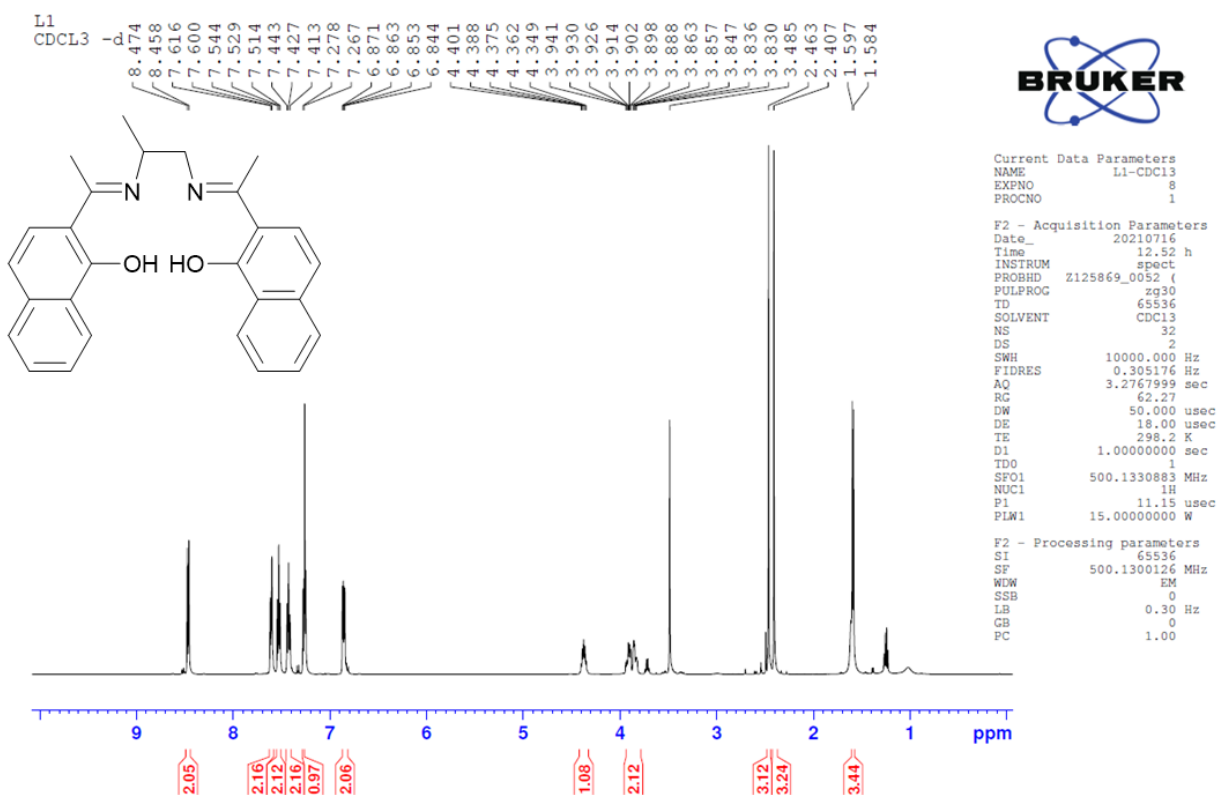Figure S1: <sup>1</sup>H-NMR in CDCl<sub>3</sub> of L1.

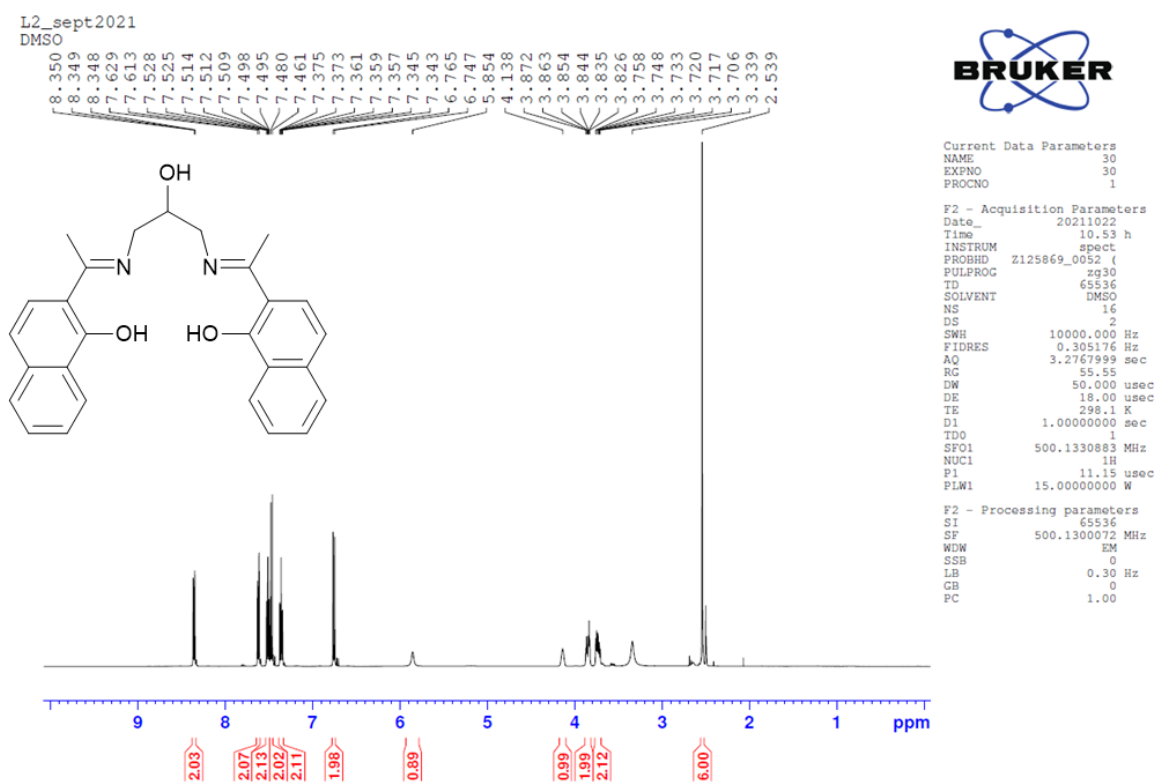Figure S2: <sup>1</sup>H-NMR in DMSO of L2.

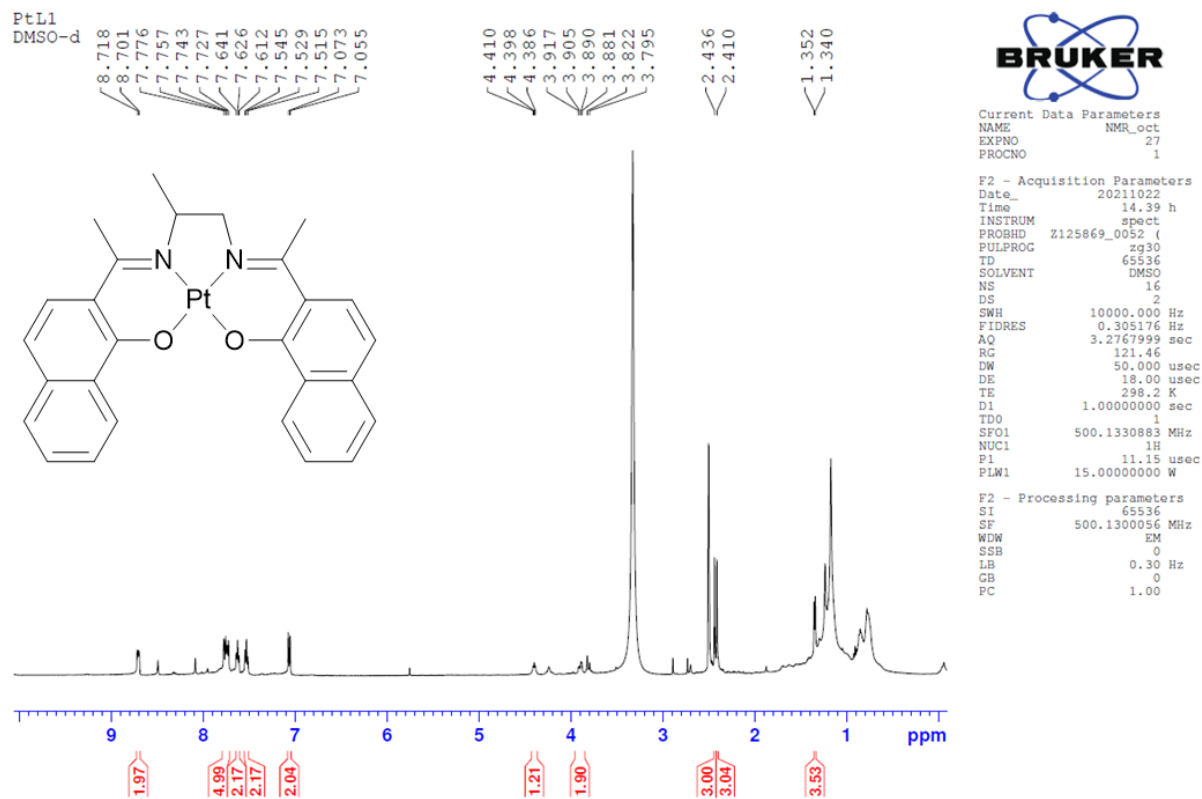Figure S3: <sup>1</sup>H-NMR in DMSO of PtL1.

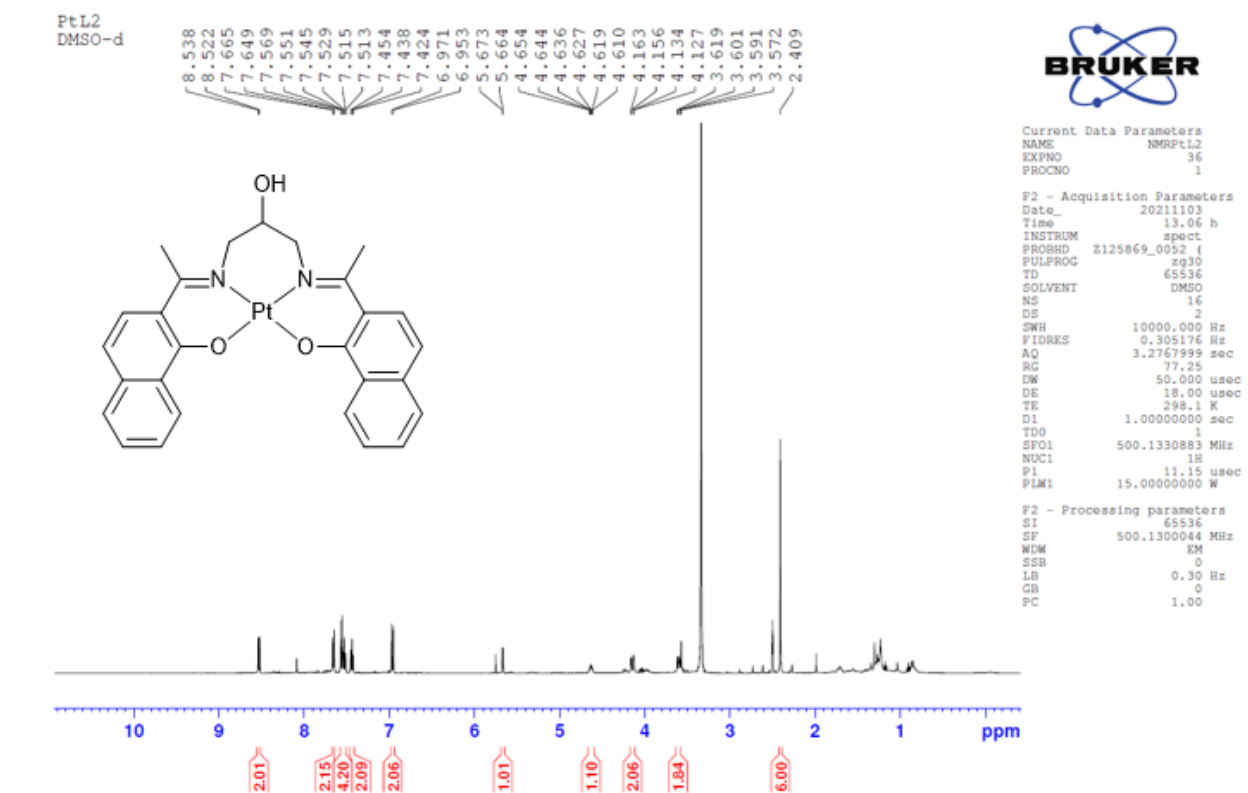Figure S4: <sup>1</sup>H-NMR in DMSO of PtL2.

FTIR

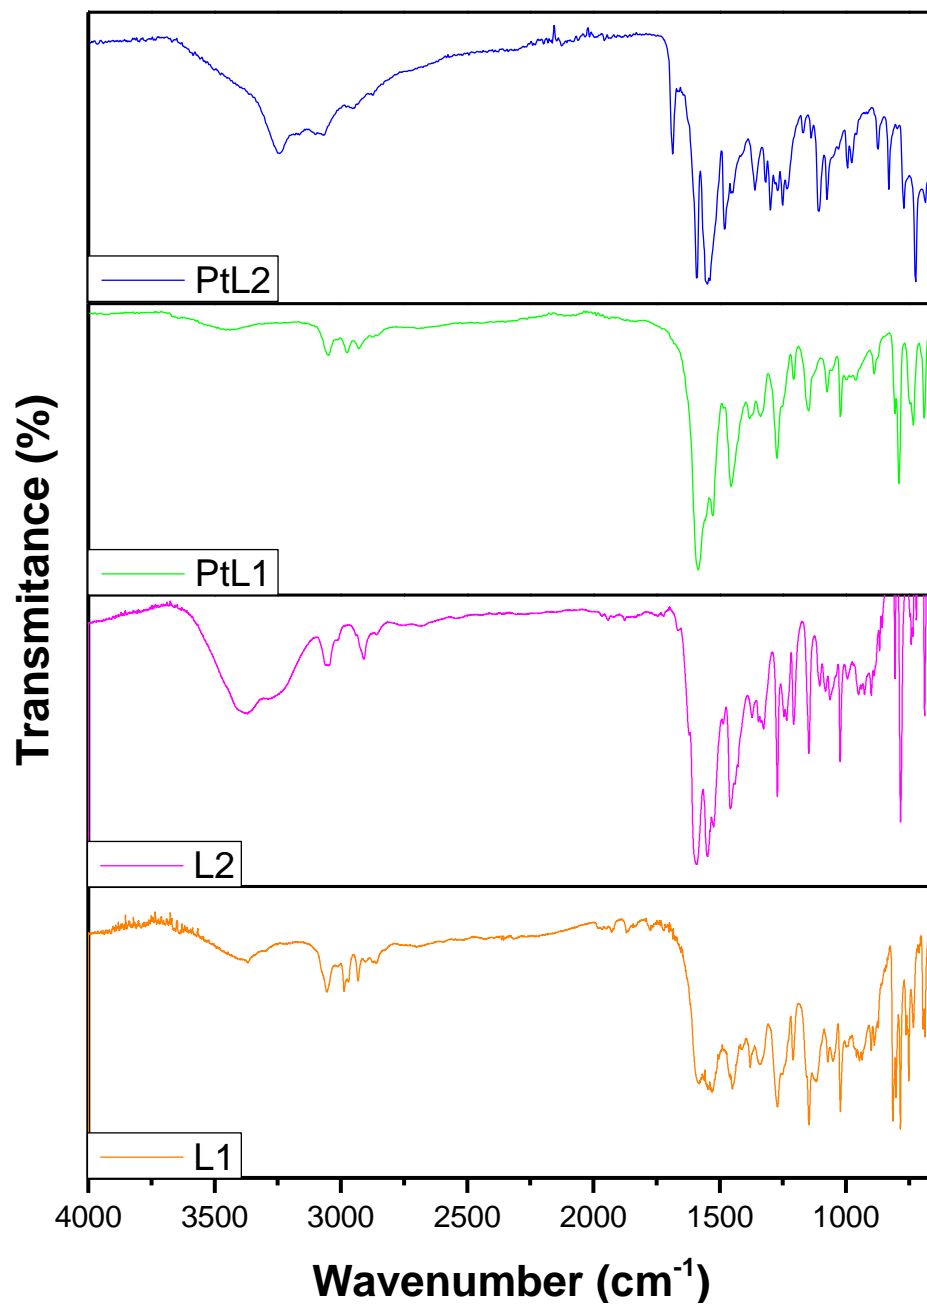

Figure S5: FTIR spectra of PtL2, PtL1, L2, and L1.

## UV-Vis

| Compound | $\lambda_{\max}$ (nm) | $\epsilon$ (dm <sup>3</sup> mol <sup>-1</sup> cm <sup>-1</sup> ) |
|----------|-----------------------|------------------------------------------------------------------|
| L1       | 325                   | 2990                                                             |
|          | 416                   | 5639                                                             |
|          | 434                   | 5259                                                             |
| L2       | 332                   | 7995                                                             |
|          | 385                   | 3134                                                             |
|          | 408                   | 4383                                                             |
| PtL1     | 432                   | 4901                                                             |
|          | 323                   | 8898                                                             |
|          | 434                   | 2209                                                             |
| PtL2     | 460                   | 1751                                                             |
|          | 302                   | 12270                                                            |
|          | 427                   | 3908                                                             |
|          | 442                   | 3720                                                             |

**Table S1:** Lambda max ( $\lambda_{\max}$ ) and molar absorptivity coefficient ( $\epsilon$ ) of all compounds.

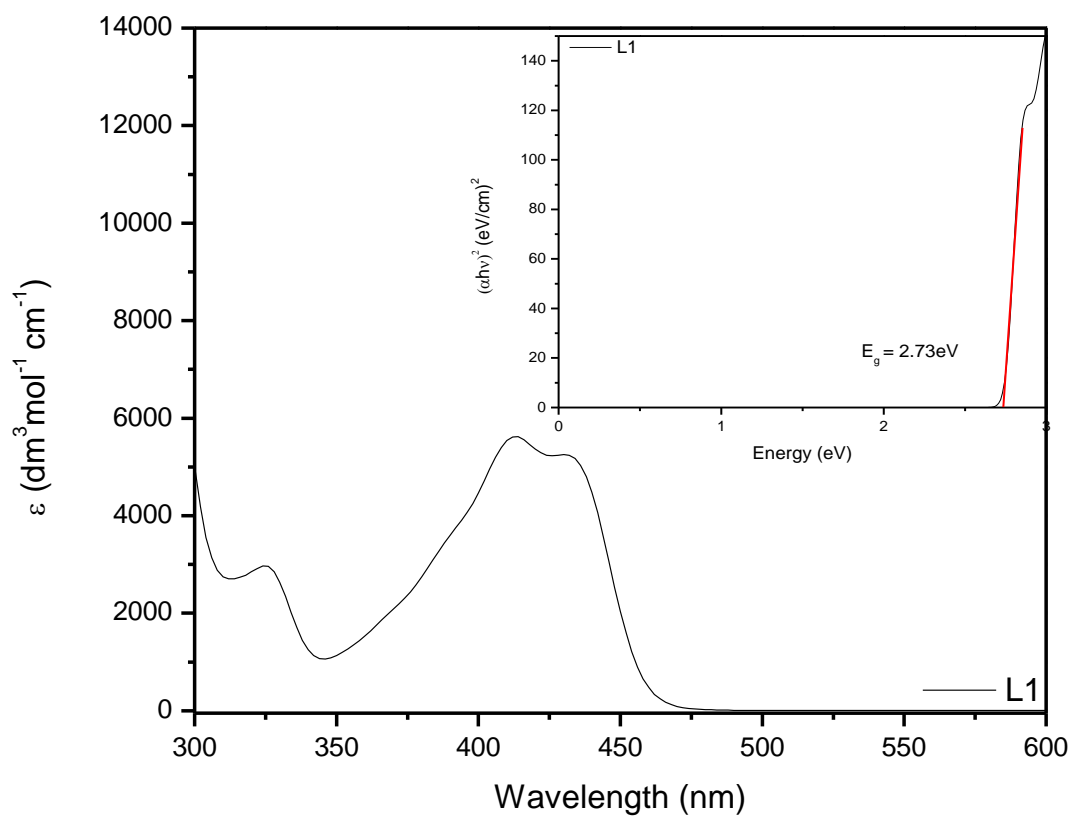

**Figure S6:** UV-Vis spectra and Tauc plot of L1 [21, 29, 32].



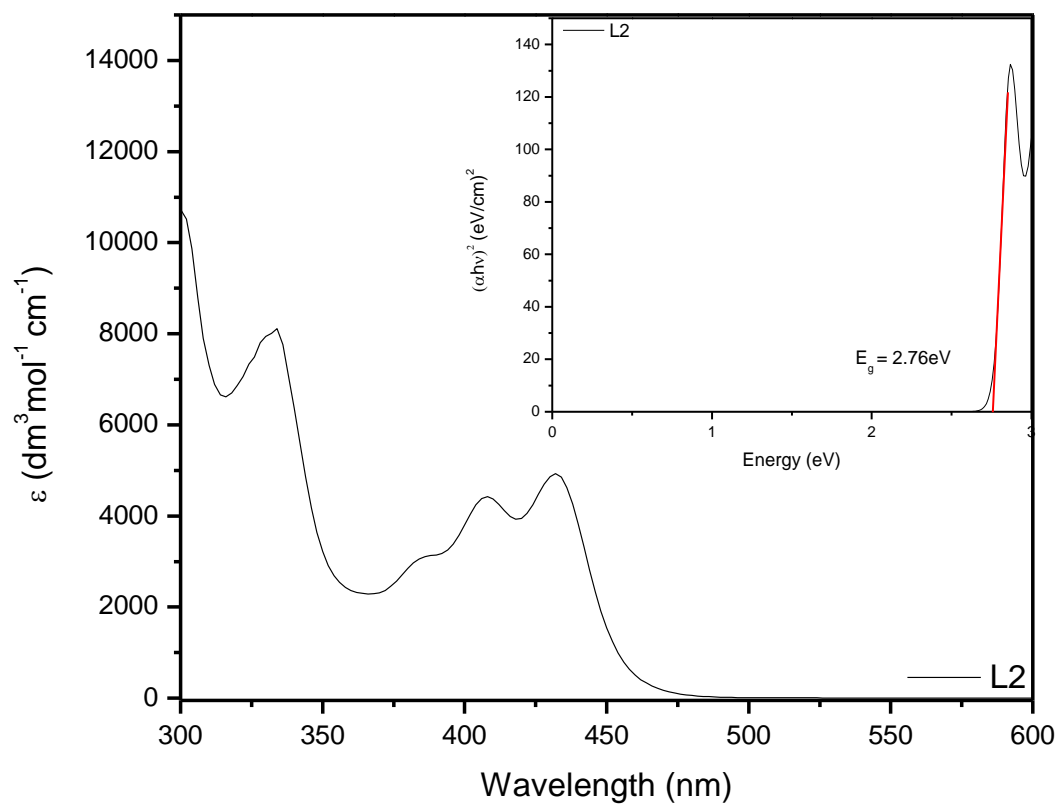

**Figure S7:** UV-Vis spectra and Tauc plot of L2 [21, 29, 32].

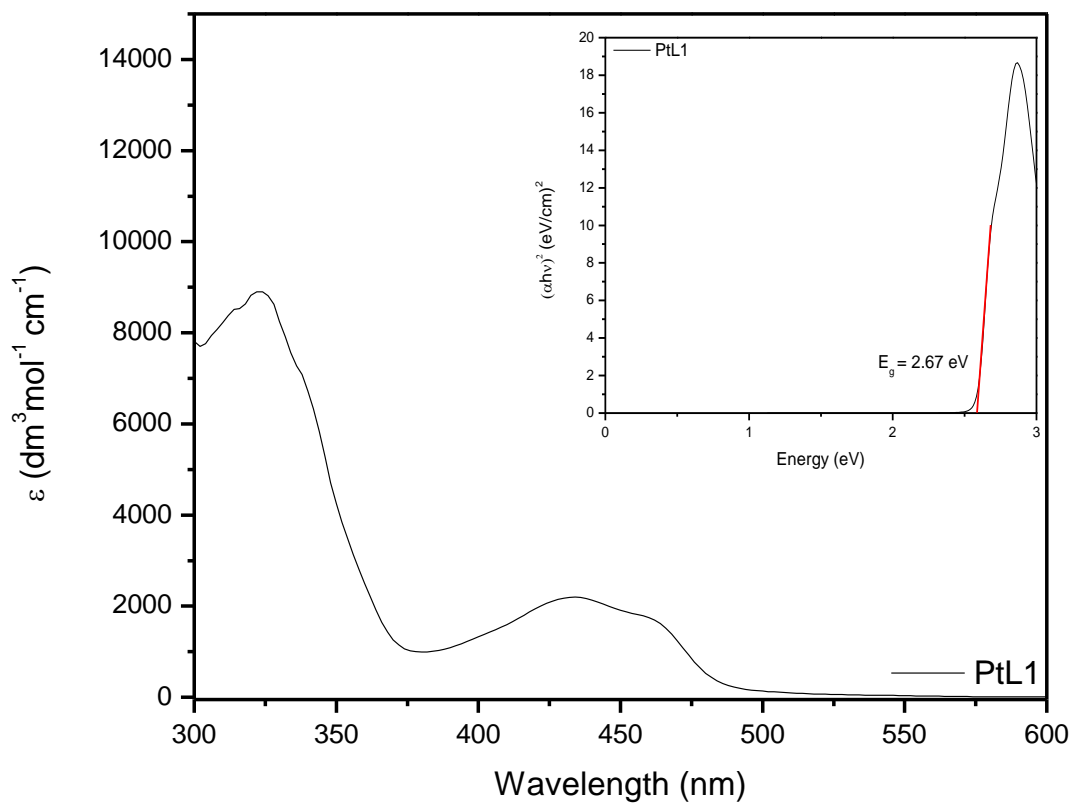

**Figure S8:** UV-Vis spectra and Tauc plot of PtL1 [21, 29, 32].

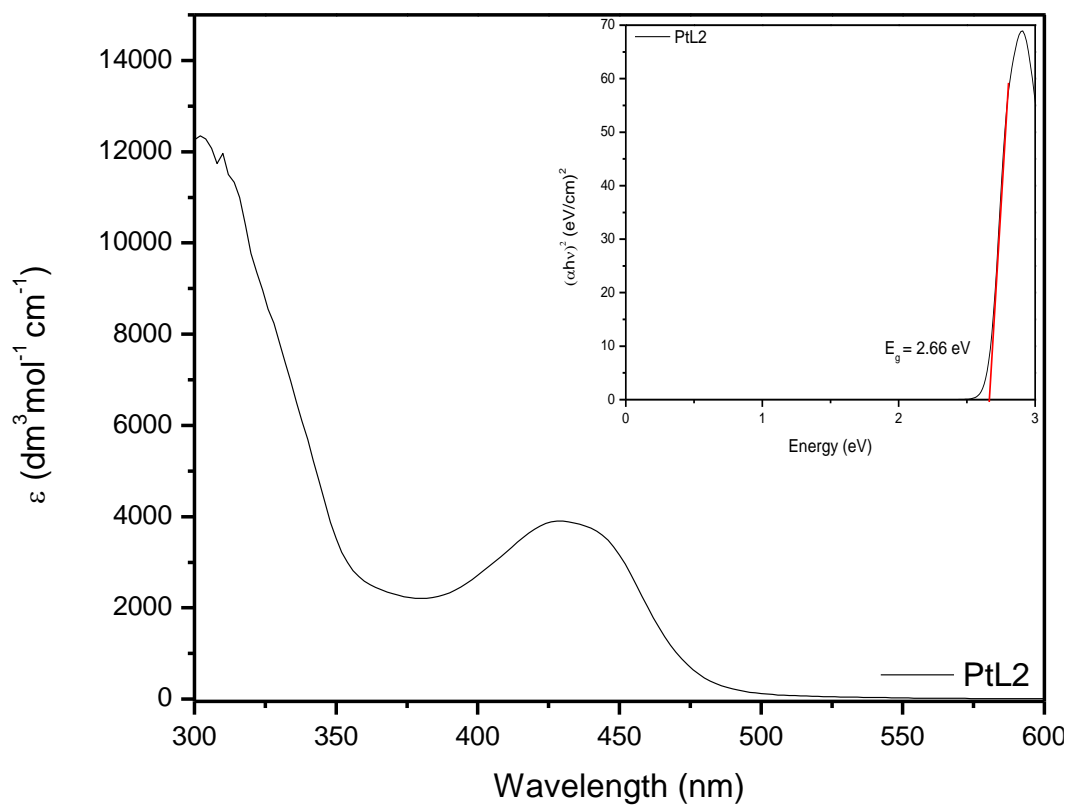

**Figure S9:** UV-Vis spectra and Tauc plot of **PtL2** [21, 29, 32].

## Structural characterization

|                                        | PtL1                                                             | PtL2                                                             |
|----------------------------------------|------------------------------------------------------------------|------------------------------------------------------------------|
| Empirical formula                      | C <sub>27</sub> H <sub>24</sub> N <sub>2</sub> O <sub>2</sub> Pt | C <sub>27</sub> H <sub>24</sub> N <sub>2</sub> O <sub>3</sub> Pt |
| Formula weight                         | 603.57                                                           | 619.57                                                           |
| Crystal Color                          | yellow                                                           | orange                                                           |
| Crystal size (mm <sup>3</sup> )        | 0.04 × 0.08 × 0.14                                               | 0.118 × 0.08 × 0.069                                             |
| Crystal system                         | monoclinic                                                       | orthorhombic                                                     |
| Space group                            | P2 <sub>1</sub> /c                                               | P2 <sub>1</sub> 2 <sub>1</sub> 2 <sub>1</sub>                    |
| Temperature (K)                        | 293(2)                                                           | 293(2)                                                           |
| a (Å)                                  | 13.74289(8)                                                      | 7.84920(10)                                                      |
| b (Å)                                  | 12.23957(9)                                                      | 12.9055(2)                                                       |
| c (Å)                                  | 13.11559(9)                                                      | 21.3423(3)                                                       |
| α (°)                                  | 90                                                               | 90                                                               |
| β (°)                                  | 98.9538(6)                                                       | 90                                                               |
| γ (°)                                  | 90                                                               | 90                                                               |
| Volume (Å <sup>3</sup> )               | 2179.25(3)                                                       | 2161.93(5)                                                       |
| Z                                      | 4                                                                | 4                                                                |
| ρ <sub>calc</sub> (g/cm <sup>3</sup> ) | 1.840                                                            | 1.904                                                            |
| μ (mm <sup>-1</sup> )                  | 12.261                                                           | 12.415                                                           |
| Reflections collected                  | 49243                                                            | 34483                                                            |
| F(000)                                 | 1176.0                                                           | 1208.0                                                           |
| Radiation                              | Cu Kα (λ = 1.54184 Å)                                            | Cu Kα (λ = 1.54184 Å)                                            |
| 2θ range for data collection/°         | 6.51 to 136.81                                                   | 8.006 to 137.16                                                  |
| Index ranges                           | -16 ≤ h ≤ 16, -14 ≤ k ≤ 14, -15 ≤ l ≤ 15                         | -9 ≤ h ≤ 9, -15 ≤ k ≤ 15, -25 ≤ l ≤ 25                           |
| Independent reflections                | 4008 [R <sub>int</sub> = 0.0460, R <sub>sigma</sub> = 0.0178]    | 3986 [R <sub>int</sub> = 0.0474, R <sub>sigma</sub> = 0.0225]    |
| Data/restraints /parameters            | 4008/0/310                                                       | 3986/0/301                                                       |

|                                                |                                     |                                     |
|------------------------------------------------|-------------------------------------|-------------------------------------|
| Goodness-of-fit on $F^2$                       | 0.985                               | 1.072                               |
| Final R indexes [ $I \geq 2\sigma(I)$ ]        | $R_1 = 0.0228$ ,<br>$wR_2 = 0.0651$ | $R_1 = 0.0213$ ,<br>$wR_2 = 0.0476$ |
| Final R indexes [all data]                     | $R_1 = 0.0250$ ,<br>$wR_2 = 0.0669$ | $R_1 = 0.0219$ ,<br>$wR_2 = 0.0479$ |
| Largest diff. peak/hole / $e \text{ \AA}^{-3}$ | 0.58/-0.91                          | 0.95/-0.95                          |

**Table S2:** Crystallographic data of **PtL1**, and **PtL2**.

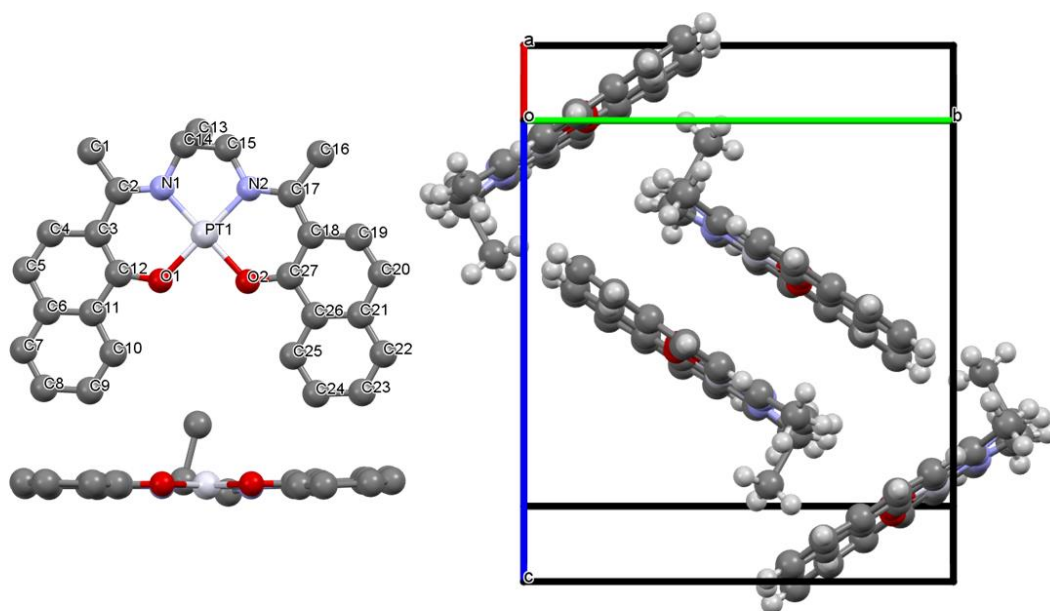

**Figure S10:** Front, side, and packing of **PtL1** crystal structure.

|                | <b>L1</b>  | <b>PtL1</b> |
|----------------|------------|-------------|
| M-O1           |            | 1.977(3)    |
| M-O2           |            | 1.978(2)    |
| M-N1           |            | 1.963(4)    |
| M-N2           |            | 1.962(4)    |
| O1-C12         | 1.2917(16) | 1.303(5)    |
| O2-C27         | 1.2923(17) | 1.301(4)    |
| N1-C2          | 1.3141(18) | 1.293(6)    |
| N1-C14         | 1.4722(18) | 1.58(2)     |
| N2-C15         | 1.4624(18) | 1.47(1)     |
| N2-C17         | 1.3121(18) | 1.305(6)    |
| C27-C18-C17-N2 |            | 1.65        |
| C12-C3-C2-N1   |            | 0.69        |
| O1-M-N1        |            | 93.1(1)     |
| O1-M-O2        |            | 85.5(1)     |
| O1-M-N2        |            | 179.5(2)    |
| O2-M-N2        |            | 94.0(1)     |
| N1-M-O2        |            | 178.8(1)    |
| N2-M-N1        |            | 86.6(2)     |
| O1-N1-N2-O2    |            | -0.64       |
| O1-N1-N2-M     |            | -179.83     |
| M•••M          |            | 8.284       |
| $\tau_4$       | -          | 0.008       |
| $\tau'_4$      | -          | 0.009       |

**Table S3:** Selected bond lengths and bond angles of **L1**, and **PtL1**. [26]

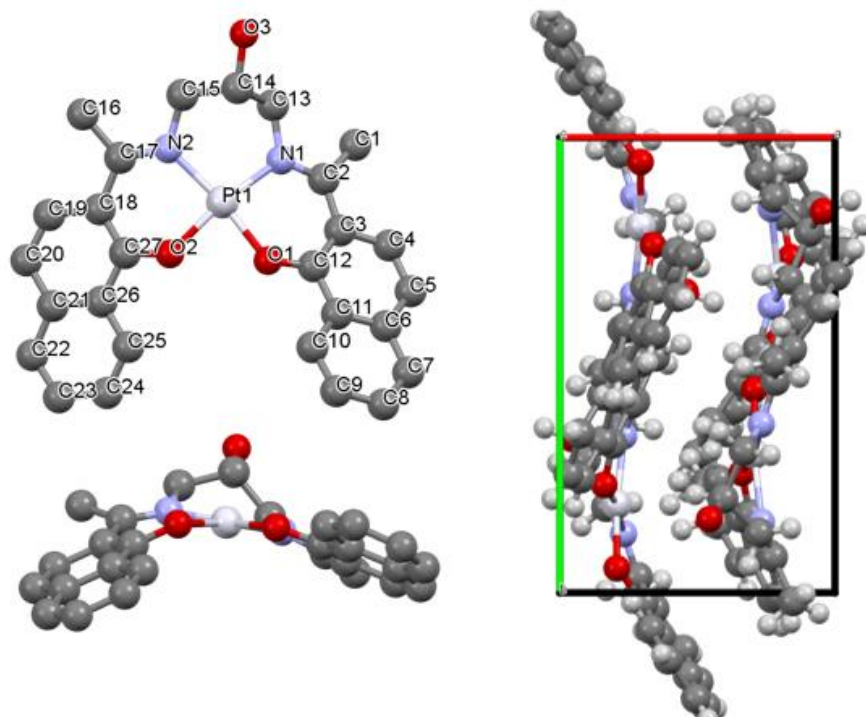

**Figure S11:** Front, side, and packing of **PtL2** crystal structure.

|                    | <b>PtL2</b> |
|--------------------|-------------|
| M-O1               | 1.995(4)    |
| M-O2               | 1.976(5)    |
| M-N1               | 2.019(5)    |
| M-N2               | 2.007(5)    |
| O1-C12             | 1.300(8)    |
| O2-C27             | 1.296(7)    |
| O3-C14             | 1.424(8)    |
| N1-C2              | 1.295(9)    |
| N1-C13             | 1.483(8)    |
| N2-C15             | 1.461(8)    |
| N2-C17             | 1.302(8)    |
| C27-C18-C17-<br>N2 | 20.40       |
| C12-C3-C2-N1       | 0.65        |
| O1-M-N1            | 89.8(8)     |
| O1- M-O2           | 81.82(17)   |
| O1- M-N2           | 170.4(2)    |
| O2- M-N2           | 91.2(2)     |
| N1- M-O2           | 170.4(2)    |
| N2- M-N1           | 97.6(2)     |
| O1-N1-N2-O2        | 7.52        |
| O1-N1-N2-M         | 173.92      |
| M•••M              | 4.177       |
| $\tau_4$           | 0.13        |
| $\tau'_4$          | 0.13        |

**Table S4:** Selected bond lengths and bond angles of **PtL2**.

## DFT calculations

|                    | L1 keto<br>(DFT) | L1 enol (DFT) | PtL1 (DFT) |
|--------------------|------------------|---------------|------------|
| Pd1-O1             |                  |               | 2.000      |
| Pd1-O2             |                  |               | 2.007      |
| Pd1-N1             |                  |               | 1.993      |
| Pd1-N2             |                  |               | 1.978      |
| O1-C12             | 1.276            | 1.333         | 1.297      |
| O2-C27             | 1.246            | 1.372         | 1.299      |
| N1-C2              | 1.332            | 1.296         | 1.322      |
| N1-C14             | 1.461            | 1.459         | 1.490      |
| N2-C15             | 1.456            | 1.453         | 1.467      |
| N2-C17             | 1.365            | 1.283         | 1.317      |
| C27-C18-C17-<br>O2 | 2.2              | 143.1         | 3.1        |
| C12-C3-C2-O1       | 0.9              | 0.0           | 4.4        |
| O1-Pd1-N1          |                  |               | 94.0       |
| O1- Pd1-O2         |                  |               | 87.1       |
| O1- Pd1-N2         |                  |               | 179.1      |
| O2- Pd1-N2         |                  |               | 92.6       |
| N1- Pd1-O2         |                  |               | 176.3      |
| N2- Pd1-N1         |                  |               | 86.4       |
| O1-N1-N2-O2        |                  |               | 2.9        |
| O1-N1-N2-M         |                  |               | 179.2      |
| O1•••O2            | 5.256            | 6.933         | 2.760      |

Table S5: Selected bond lengths and bond angles of L1, PdL1, and PtL1 optimized geometry.



|                | L2 enol (DFT) | L2 keto (DFT) | PtL2 (DFT) |
|----------------|---------------|---------------|------------|
| Pd1-O1         |               |               | 2.010      |
| Pd1-O2         |               |               | 2.011      |
| Pd1-N1         |               |               | 2.028      |
| Pd1-N2         |               |               | 2.027      |
| O1-C12         | 1.371         | 1.247         | 1.298      |
| O2-C27         | 1.333         | 1.280         | 1.297      |
| O3-C14         | 1.433         | 1.428         | 1.433      |
| N1-C2          | 1.282         | 1.361         | 1.322      |
| N1-C13         | 1.455         | 1.455         | 1.469      |
| N2-C15         | 1.453         | 1.450         | 1.469      |
| N2-C17         | 1.298         | 1.334         | 1.323      |
| C19-C18-C17-O2 | 1.0           | 0.7           | 10.9       |
| C4-C3-C2-O1    | 1.5           | 1.8           | 10.7       |
| O1-Pd1-N1      |               |               | 88.6       |
| O1- Pd1-O2     |               |               | 86.2       |
| O1- Pd1-N2     |               |               | 174.7      |
| O2- Pd1-N2     |               |               | 88.6       |
| N1- Pd1-O2     |               |               | 174.8      |
| N2- Pd1-N1     |               |               | 96.6       |
| O1-N1-N2-O2    |               |               | 0.1        |
| O1-N1-N2-M     |               |               | 178.9      |
| O1•••O2        | 3.710         | 6.724         | 2.748      |

**Table S6:** Selected bond lengths and bond angles of **L2**, **PdL2**, and **PtL2** optimized geometry.

| Species   | HOMO (eV) | LUMO (eV) | E <sub>g</sub> (eV) |
|-----------|-----------|-----------|---------------------|
| L1 (keto) | -5.15     | -2.07     | 3.09                |
| L1 (enol) | -5.38     | -1.52     | 3.86                |
| L2 (keto) | -5.03     | -2.19     | 2.84                |
| L2 (enol) | -5.60     | -1.65     | 3.95                |
| PdL1      | -5.05     | -1.67     | 3.37                |
| PtL1      | -4.94     | -1.78     | 3.17                |
| PdL2      | -5.17     | -1.74     | 3.43                |
| PtL2      | -5.09     | -1.72     | 3.37                |

**Table S7:** Theoretical HOMO, LUMO, and bandgap (E<sub>g</sub>) values of the studied compounds at B3LYP/6-31+G\* level of theory.

## Electrochemical studies

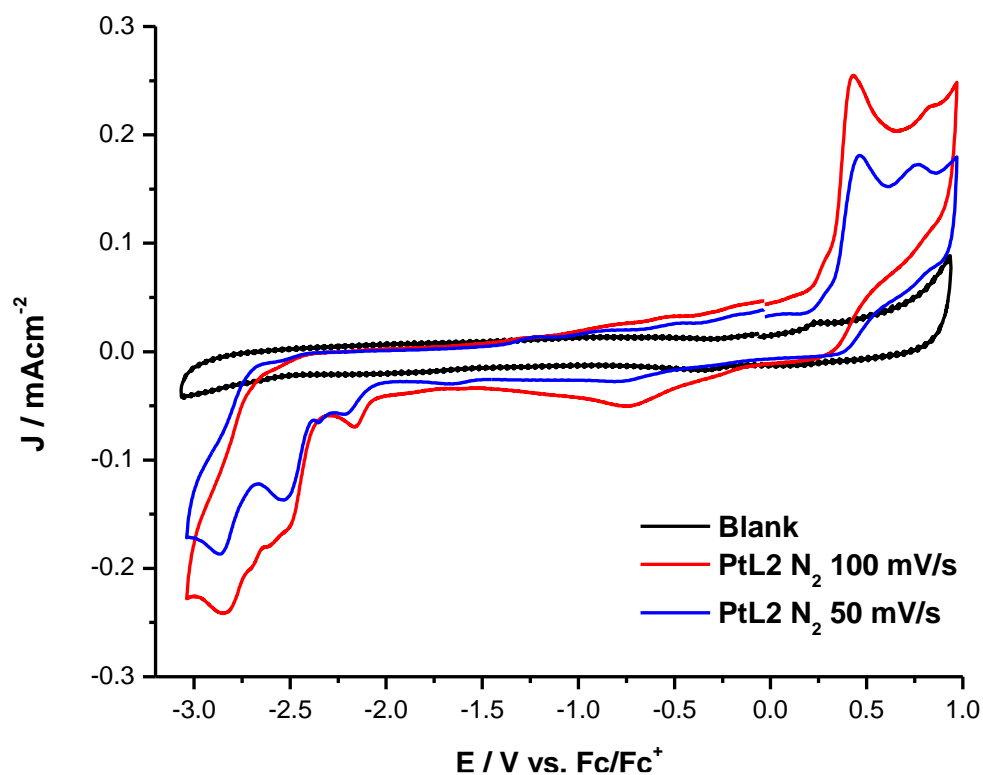

**Figure S12:** Cyclic voltammograms of 1 mM PtL2 at 100 mV/s and 50 mV/s in DMF with 0.1M TBAPF6 under N<sub>2</sub> inert atmosphere.

|              | E <sub>ox, 1</sub> (V vs Fc/Fc <sup>+</sup> ) | E <sub>ox, 2</sub> (V vs Fc/Fc <sup>+</sup> ) | E <sub>ox, 3</sub> (V vs Fc/Fc <sup>+</sup> ) | E <sub>red, 1</sub> (V vs Fc/Fc <sup>+</sup> ) | E <sub>red, 2</sub> (V vs Fc/Fc <sup>+</sup> ) | E <sub>red, 3</sub> (V vs Fc/Fc <sup>+</sup> ) | E <sub>red, 4</sub> (V vs Fc/Fc <sup>+</sup> ) |
|--------------|-----------------------------------------------|-----------------------------------------------|-----------------------------------------------|------------------------------------------------|------------------------------------------------|------------------------------------------------|------------------------------------------------|
| <b>L1</b>    | 0.47                                          | -0.85                                         | -                                             | -2.49                                          | -                                              | -                                              | -                                              |
| <b>L2</b>    | 0.35                                          | -                                             | -                                             | -2.38                                          | -                                              | -                                              | -                                              |
| <b>PtL1</b>  | 0.38                                          | -2.40                                         | -1.69                                         | -2.55                                          | -2.90                                          | -                                              | -                                              |
| <b>PtL2*</b> | 0.43                                          | -                                             | -                                             | -2.21                                          | -2.53                                          | -2.86                                          | -                                              |

\*Redox peaks were determined at a scan rate of 50 mV/s.

**Table S8:** Redox processes of L1, L2, PtL1, and PtL2 referenced to ferrocene internal standard under N<sub>2</sub> saturation.

*CO<sub>2</sub> reduction reaction*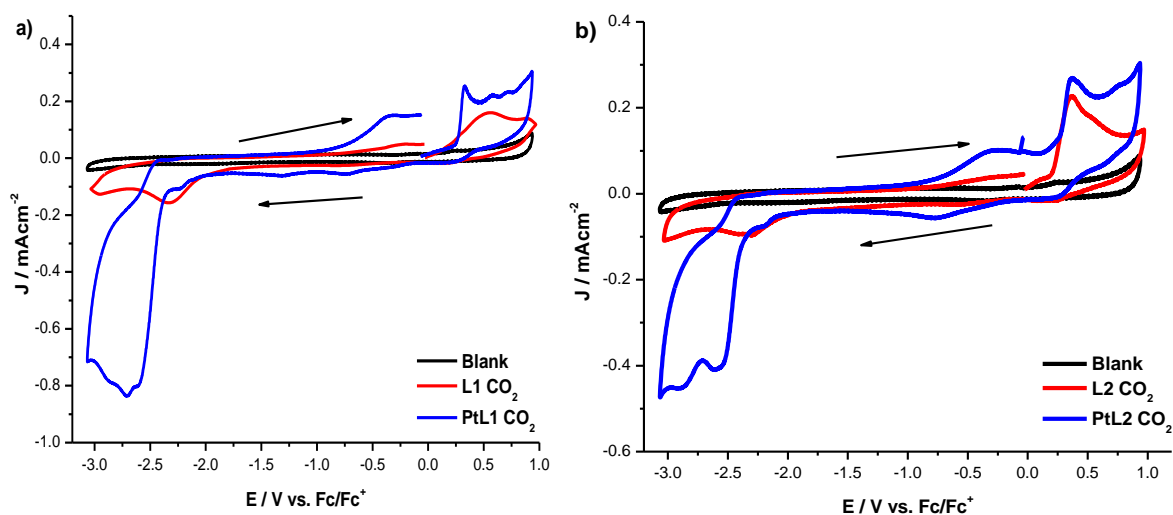

**Figure S13:** Cyclic voltammograms of 1 mM of L1, L2, PtL1, and PtL2 at 100 mV/s in DMF with 0.1M TBAPF6. a) L1 and b) L2 samples under  $\text{CO}_2$  atmosphere.

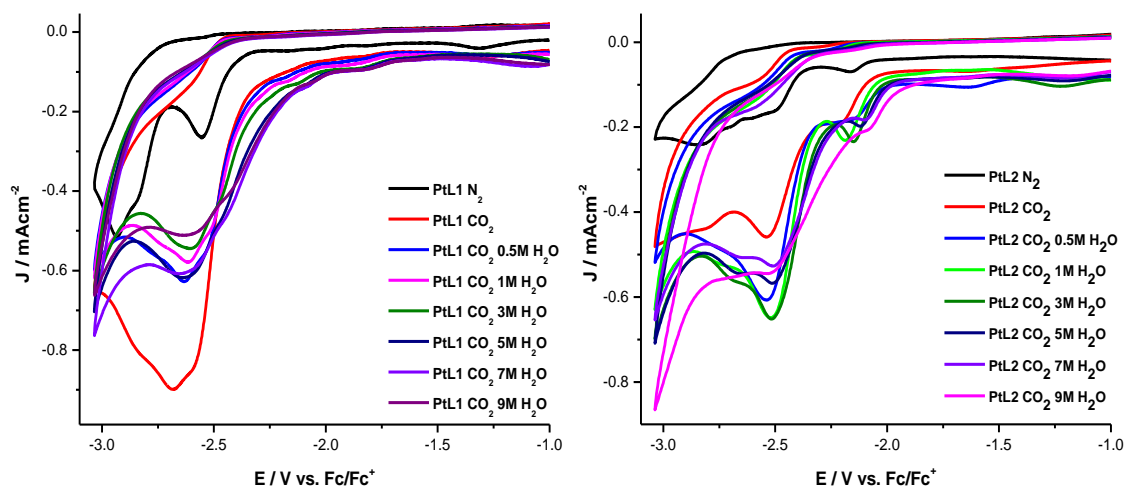

**Figure S14:** Cyclic voltammograms of 1 mM of a) PtL1 and b) PtL2 at 100 mV/s in DMF with 0.1M TBAPF6 under  $\text{CO}_2$  saturation and addition of water as a sacrificial proton source.

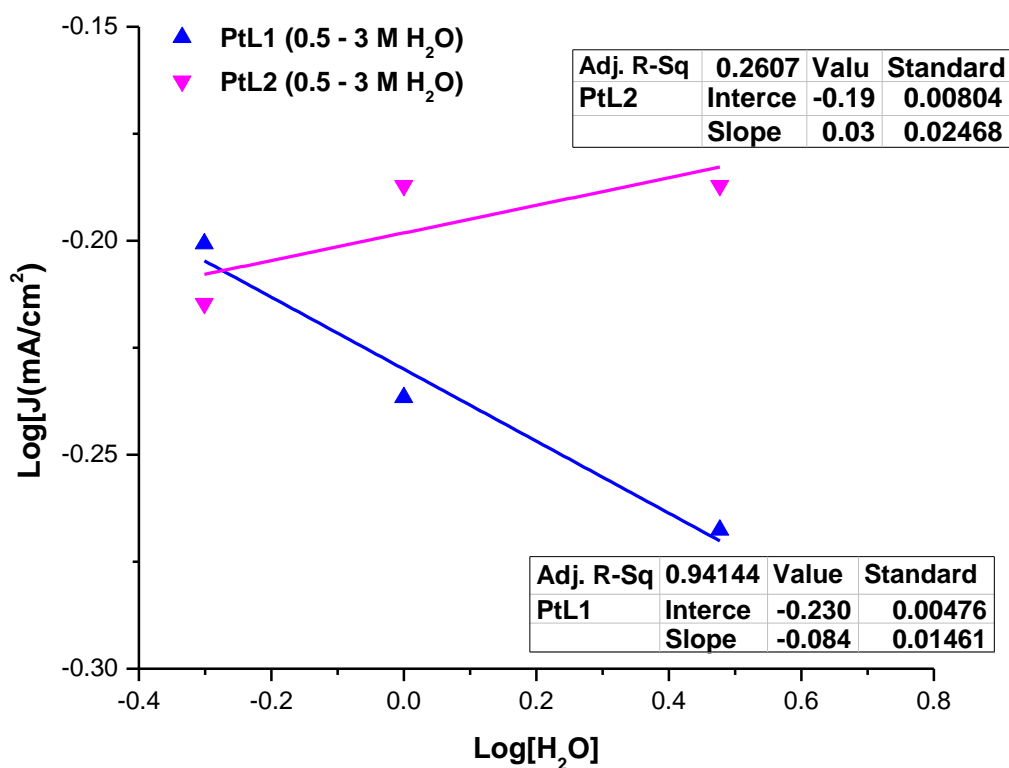

**Figure S15:** Log-Log plot of CV under CO<sub>2</sub> saturation and various H<sub>2</sub>O of PtL1, and PtL2 at 1mM [39, 40].

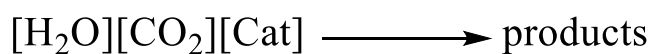

$$r = k[\text{H}_2\text{O}][\text{CO}_2][\text{Cat}]$$

$$k' = k[\text{CO}_2][\text{Cat}]$$

$$r = k'[\text{H}_2\text{O}]$$

$$\ln[\text{H}_2\text{O}] = \ln[\text{H}_2\text{O}]_0 - kt$$

**first order kinetics**

*Bulk Electrolysis*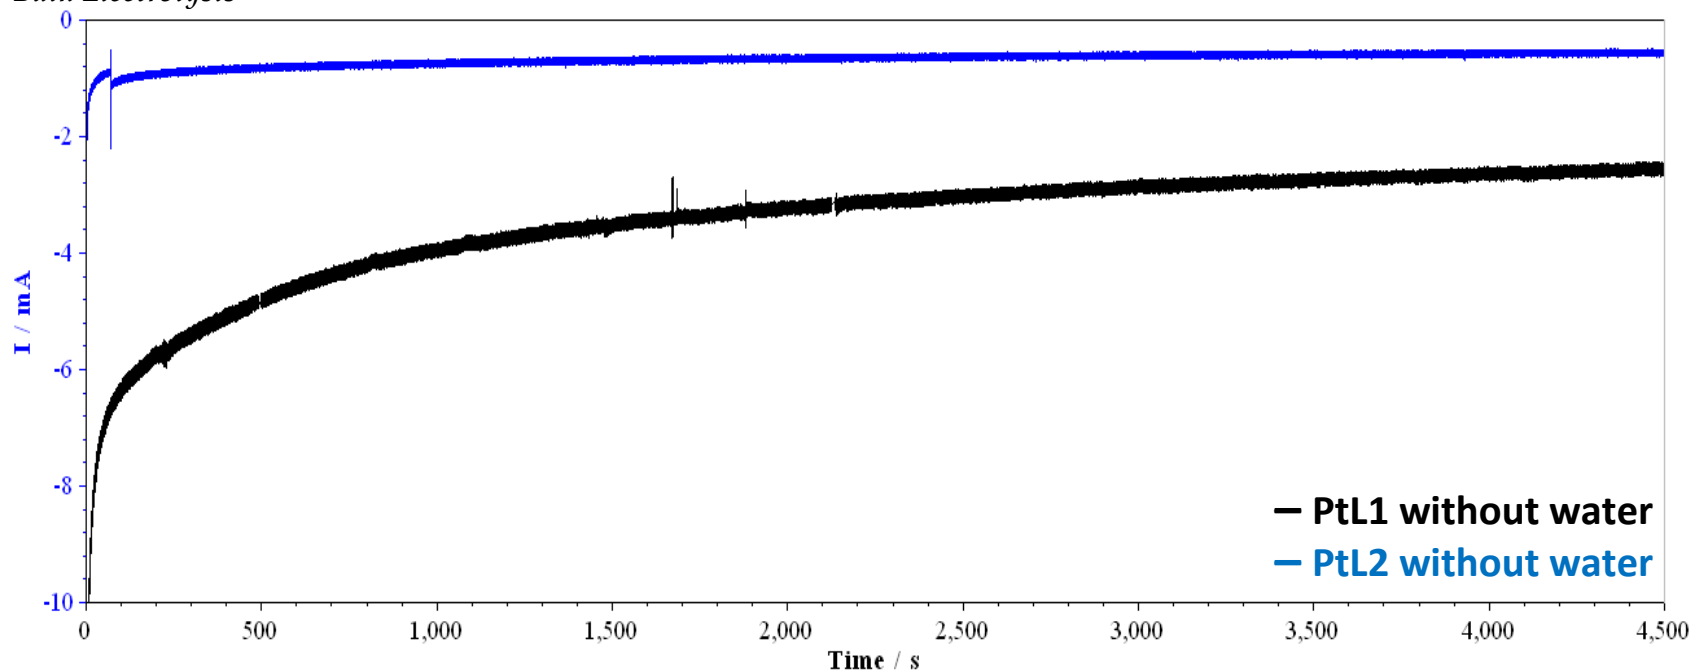

**Figure S16:** Bulk electrolysis of 1 mM of **PtL1** (black) at -2.7 V vs Fc/Fc<sup>+</sup> and **PtL2** (blue) -2.5 V vs Fc/Fc<sup>+</sup> for 4500 s in DMF with 0.1 M TBAPF<sub>6</sub> under CO<sub>2</sub> saturation.

| PtL1<br>no H <sub>2</sub> O<br>-2.7 | Injection | Time (s) | [CO] (mol) | Charge (C) | FE%  |
|-------------------------------------|-----------|----------|------------|------------|------|
|                                     | 1         | 1800     | 1.93E-06   | 7.97397    | 4.68 |
|                                     | 2         | 4080     | 4.16E-06   | 14.6013    | 5.49 |
| PtL2<br>no H <sub>2</sub> O<br>-2.5 | Injection | Time (s) | [CO] (mol) | Charge (C) | FE%  |
|                                     | 1         | 1800     | 5.81E-06   | 1.42391    | 3.93 |
|                                     | 2         | 3600     | 2.90E-07   | 2.49933    | 4.43 |

**Table S9:** Product quantification for CO<sub>2</sub>RR under aprotic conditions of 1 mM of **PtL1** and **PtL2**.

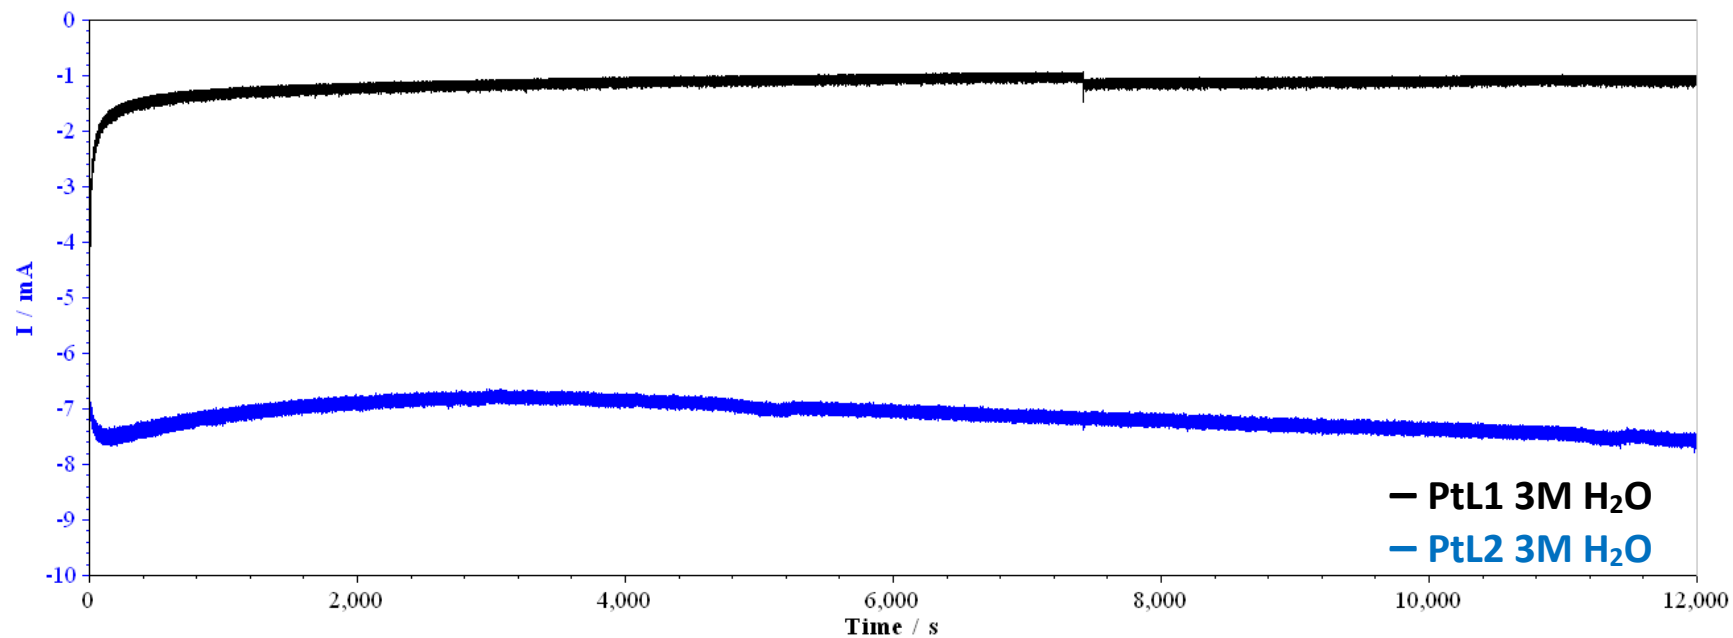

**Figure S17:** Bulk electrolysis of 1 mM of **PtL1** (black) at -2.7 V vs Fc/Fc<sup>+</sup> and **PtL2** (blue) -2.5 V vs Fc/Fc<sup>+</sup> for 12000 s in DMF with 0.1M TBAPF<sub>6</sub> under CO<sub>2</sub> saturation.

|                                            |                  |                 |                   |                   |             |
|--------------------------------------------|------------------|-----------------|-------------------|-------------------|-------------|
| <b>PtL1</b><br>-2.7<br>3M H <sub>2</sub> O | <b>Injection</b> | <b>Time (s)</b> | <b>[CO] (mol)</b> | <b>Charge (C)</b> | <b>FE %</b> |
|                                            | 1                | 1800            | 2.44E-07          | 2.56739           | 1.84        |
|                                            | 2                | 3600            | 5.63E-07          | 4.6751            | 2.32        |
|                                            | 3                | 7200            | 1.93E-06          | 8.49651           | 4.39        |
|                                            | 4                | 9000            | 2.86E-06          | 10.4846           | 5.27        |
|                                            | 5                | 10800           | 3.26E-06          | 12.4416           | 5.05        |
| <b>PtL2</b><br>-2.5<br>3M H <sub>2</sub> O | <b>Injection</b> | <b>Time (s)</b> | <b>[CO] (mol)</b> | <b>Charge (C)</b> | <b>FE %</b> |
|                                            | 1                | 1800            | 2.82E-05          | 12.9496           | 41.99       |
|                                            | 2                | 3600            | 4.48E-05          | 25.2499           | 34.26       |
|                                            | 3                | 7200            | 6.62E-05          | 50.4139           | 25.32       |
|                                            | 4                | 9000            | 6.75E-05          | 63.4254           | 20.53       |
|                                            | 5                | 10800           | 6.81E-05          | 76.694            | 17.13       |

**Table S10:** Product quantification for CO<sub>2</sub>RR under protic conditions (3M H<sub>2</sub>O) of 1 mM of **PtL1** and **PtL2**.

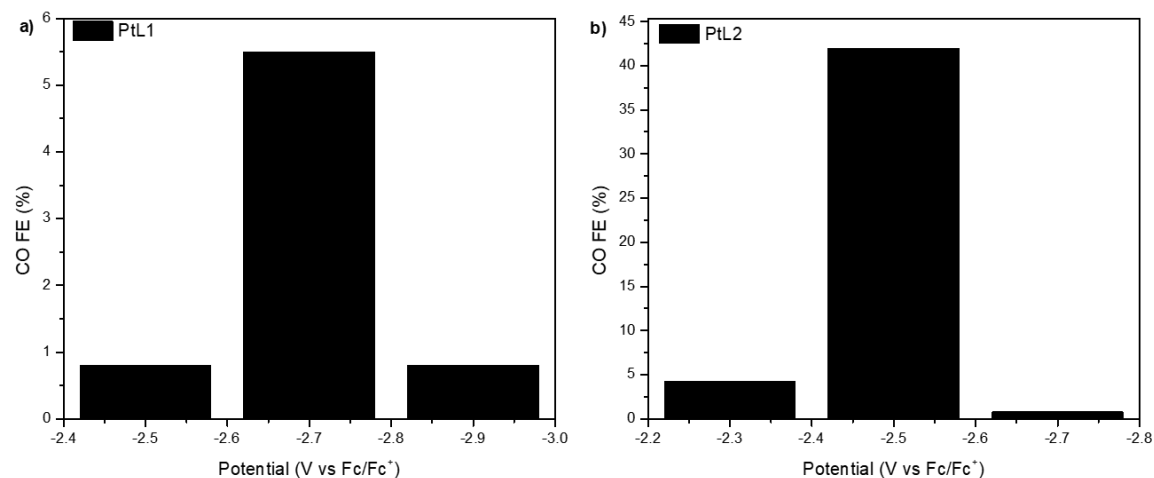

**Figure S18:** CO formation at different potentials for a) **PtL1** (-2.3, -2.5, and -2.7 V vs Fc/Fc<sup>+</sup>) and b) **PtL2** (-2.5, -2.7, and -2.9 V vs Fc/Fc<sup>+</sup>). Conditions: working electrode and counter electrode were graphite rods, reference electrode was 0.01 M AgNO<sub>3</sub>, and 3 M H<sub>2</sub>O.

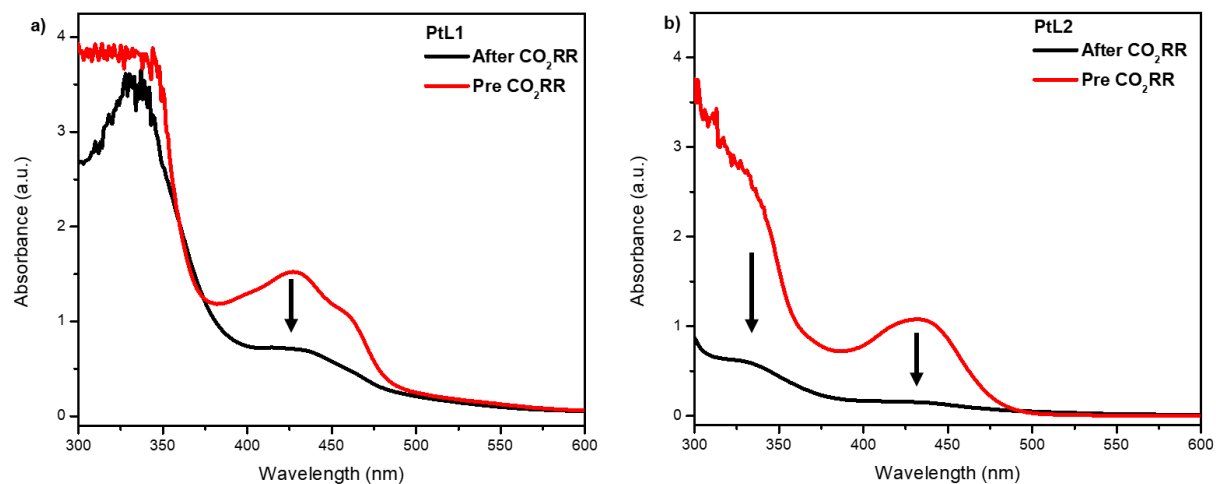

**Figure S19:** UV-Vis spectra before and after CO<sub>2</sub>RR a) **PtL1** and b) **PtL2**. NOTE: Solutions after electrolysis were diluted from 1 mM to 0.3 mM to avoid UV-Vis signal saturation using the 0.1 M TBAPF<sub>6</sub> in DMF electrolyte solution.
